# Supplementary material
Source: MDPI journal article supplement (https://www.mdpi.com/1996-1073/16/2/651)
Supplement: s1 [file s1]

Archive with 2 entries (2 files):
- Supplementary Data - Figure S1.pdf
- Supplementary Data - Table S1.pdf
