# Supplementary material
Source: MDPI journal article supplement (https://www.mdpi.com/1996-1073/16/2/651)
Supplement: s1 [file s1]

**Table S1.** Rice grain production (tons) in 2010-2019

| Provinces        | Year     |          |          |          |          |          |          |          |          |          | Average  |
|------------------|----------|----------|----------|----------|----------|----------|----------|----------|----------|----------|----------|
|                  | 2010     | 2011     | 2012     | 2013     | 2014     | 2015     | 2016     | 2017     | 2018     | 2019     |          |
| Banteay Meanchey | 629,686  | 633,358  | 608,412  | 628,869  | 699,326  | 710,720  | 778,805  | 954,997  | 979,281  | 928,755  | 755,221  |
| Battam Bang      | 799,605  | 785,351  | 881,773  | 795,611  | 766,143  | 861,506  | 938,032  | 1,148,93 | 1,249,36 | 1,236,78 | 946,310  |
| Kampong Cham     | 470,560  | 474,670  | 478,100  | 477,220  | 467,823  | 412,692  | 494,384  | 504,015  | 488,292  | 496,307  | 476,406  |
| Kampong          | 386,660  | 449,216  | 503,187  | 511,458  | 511,858  | 493,324  | 545,532  | 562,076  | 594,818  | 640,342  | 519,847  |
| Kampong Speu     | 300,053  | 357,613  | 343,789  | 357,370  | 308,818  | 339,617  | 347,451  | 347,223  | 354,247  | 340,943  | 339,712  |
| Kampong Thom     | 540,636  | 549,071  | 688,400  | 691,389  | 725,267  | 723,228  | 786,573  | 802,703  | 864,845  | 869,584  | 724,170  |
| KamPot           | 401,454  | 428,566  | 437,789  | 45,425   | 436,704  | 470,014  | 475,682  | 476,569  | 493,706  | 485,813  | 415,172  |
| Kandal           | 387,878  | 394,323  | 400,021  | 398,376  | 402,895  | 343,284  | 370,437  | 388,917  | 387,850  | 358,572  | 383,255  |
| Koh Kong         | 23,679   | 25,262   | 26,947   | 28,866   | 29,031   | 29,659   | 27,705   | 28,225   | 30,574   | 2,656    | 25,260   |
| Kratie           | 130,686  | 136,772  | 155,236  | 149,454  | 148,107  | 142,090  | 151,266  | 157,174  | 154,700  | 151,140  | 147,663  |
| Mondul kiri      | 37,132   | 57,721   | 45,782   | 56,798   | 54,068   | 54,289   | 64,591   | 70,661   | 72,977   | 67,551   | 58,157   |
| Phnom Penh       | 13,566   | 35,094   | 37,537   | 39,827   | 36,639   | 35,964   | 29,703   | 31,629   | 28,422   | 22,812   | 31,119   |
| Preah Vihear     | 116,978  | 145,307  | 163,215  | 213,758  | 209,304  | 229,417  | 241,596  | 252,040  | 255,652  | 265,920  | 209,319  |
| Prey Veng        | 1,098,34 | 1,153,78 | 1,194,43 | 1,260,91 | 1,257,54 | 1,266,42 | 1,257,63 | 1,343,09 | 1,424,16 | 1,367,92 | 1,262,42 |
| Pursat           | 311,738  | 308,422  | 416,011  | 389,612  | 386,653  | 379,162  | 443,695  | 452,102  | 536,206  | 527,511  | 415,111  |
| Ratana Kiri      | 65,858   | 72,004   | 66,047   | 55,510   | 63,453   | 52,693   | 65,285   | 69,655   | 60,606   | 60,702   | 63,181   |
| Siemreap         | 520,497  | 544,513  | 559,231  | 560,109  | 551,854  | 539,486  | 559,414  | 559,769  | 545,888  | 556,351  | 549,711  |
| Preah Sihanouk   | 37,211   | 38,764   | 50,235   | 48,625   | 46,885   | 45,689   | 47,529   | 46,003   | 39,079   | 34,254   | 43,427   |
| Stung Treng      | 62,628   | 75,490   | 73,680   | 65,483   | 73,121   | 74,794   | 78,742   | 71,441   | 71,434   | 62,005   | 70,882   |
| Svay Rieng       | 469,320  | 505,499  | 522,331  | 539,202  | 541,620  | 528,672  | 562,955  | 562,144  | 547,989  | 566,530  | 534,626  |
| Takeo            | 967,546  | 1,105,03 | 1,147,19 | 1,161,47 | 1,115,72 | 1,126,47 | 1,135,85 | 1,146,84 | 1,179,93 | 1,208,67 | 1,129,47 |
| Oddar Meanchey   | 145,345  | 163,977  | 150,876  | 164,011  | 151,450  | 158,925  | 221,672  | 213,789  | 186,873  | 262,608  | 181,953  |
| Kep              | 9,608    | 10,653   | 11,282   | 11,414   | 11,418   | 11,699   | 11,810   | 12,068   | 12,171   | 12,367   | 11,449   |
| Pailin           | 23,896   | 27,468   | 25,607   | 27,302   | 21,284   | 15,124   | 19,088   | 20,841   | 21,270   | 28,523   | 23,040   |
| Tboung Khmum     | 288,940  | 301,440  | 303,620  | 303,060  | 307,428  | 290,340  | 296,839  | 304,425  | 311,395  | 307,209  | 301,470  |

The data of rice grain retrieved from the Ministry of Agriculture, Forestry and Fisheries (Supplementary Data, Figure S1)
