# Supplementary material
Source: MDPI journal article supplement (https://www.mdpi.com/1996-1073/16/2/651)
Supplement: s1 [file s1]

**Quantities of Rice Grain Production in Rainy Season 2010 and Dried Season 2010-2011**

| No    | Cities/Provinces | Rainy Season 2010    |                     |                | Dried Season 2010-2011 |                     |                | Annual Total 2010-2011 |                     |                |
|-------|------------------|----------------------|---------------------|----------------|------------------------|---------------------|----------------|------------------------|---------------------|----------------|
|       |                  | Harvested Areas (ha) | Efficiencies (t/ha) | Quantities (t) | Harvested Areas (ha)   | Efficiencies (t/ha) | Quantities (t) | Harvested Areas (ha)   | Efficiencies (t/ha) | Quantities (t) |
| 1     | Banteay Meanchey | 222,095              | 2.791               | 619,860        | 2,835                  | 3.466               | 9,826          | 224,930                | 2.799               | 629,686        |
| 2     | Battam Bang      | 269,202              | 2.810               | 756,458        | 10,029                 | 4.302               | 43,147         | 279,231                | 2.864               | 799,605        |
| 3     | Kampong Cham     | 165,606              | 3.341               | 553,320        | 52,247                 | 4.136               | 216,079        | 217,853                | 3.532               | 769,399        |
| 4     | Kampong Chhnang  | 104,574              | 2.703               | 282,620        | 24,450                 | 4.255               | 104,040        | 129,024                | 2.997               | 386,660        |
| 5     | Kampong Speu     | 110,959              | 2.690               | 298,478        | 493                    | 3.195               | 1,575          | 111,452                | 2.692               | 300,053        |
| 6     | Kampong Thom     | 182,591              | 2.289               | 418,007        | 30,697                 | 3.995               | 122,629        | 213,288                | 2.535               | 540,636        |
| 7     | KamPot           | 128,230              | 3.025               | 387,885        | 4,070                  | 3.334               | 13,569         | 132,300                | 3.034               | 401,454        |
| 8     | Kandal           | 43,901               | 2.950               | 129,498        | 61,990                 | 4.168               | 258,380        | 105,891                | 3.663               | 387,878        |
| 9     | Koh Kong         | 9,057                | 2.614               | 23,679         | –                      | –                   | –              | 9,057                  | 2.614               | 23,679         |
| 10    | Kratie           | 30,093               | 2.827               | 85,075         | 14,165                 | 3.220               | 45,611         | 44,258                 | 2.953               | 130,686        |
| 11    | Mondul kiri      | 17,382               | 2.136               | 37,132         | –                      | –                   | –              | 17,382                 | 2.136               | 37,132         |
| 12    | Phnom Penh       | 4,265                | 2.865               | 12,218         | 385                    | 3.501               | 1,348          | 4,650                  | 2.917               | 13,566         |
| 13    | Preah Vihear     | 44,877               | 2.600               | 116,680        | 88                     | 3.386               | 298            | 44,965                 | 2.602               | 116,978        |
| 14    | Prey Veng        | 272,754              | 2.731               | 744,861        | 80,521                 | 4.390               | 353,487        | 353,275                | 3.109               | 1,098,348      |
| 15    | Pursat           | 104,116              | 2.740               | 285,278        | 8,138                  | 3.257               | 26,505         | 112,254                | 2.777               | 311,783        |
| 16    | Ratana Kiri      | 26,343               | 2.500               | 65,858         | –                      | –                   | –              | 26,343                 | 2.500               | 65,858         |
| 17    | Siemreap         | 178,975              | 2.554               | 457,103        | 16,260                 | 3.899               | 63,394         | 195,235                | 2.666               | 520,497        |
| 18    | Preah Sihanouk   | 14,042               | 2.650               | 37,211         | –                      | –                   | –              | 14,042                 | 2.650               | 37,211         |
| 19    | Stung Treng      | 25,773               | 2.430               | 62,628         | –                      | –                   | –              | 25,773                 | 2.430               | 62,628         |
| 20    | Svay Rieng       | 167,178              | 2.420               | 404,571        | 16,240                 | 3.987               | 64,749         | 183,418                | 2.559               | 469,320        |
| 21    | Takeo            | 183,804              | 3.245               | 596,439        | 80,904                 | 4.587               | 371,107        | 264,708                | 3.655               | 967,546        |
| 22    | Oddar Meanchey   | 57,881               | 2.502               | 144,820        | 150                    | 3.500               | 525            | 58,031                 | 2.505               | 145,345        |
| 23    | Kep              | 3,080                | 3.088               | 9,510          | 20                     | 4.900               | 98             | 3,100                  | 3.099               | 9,608          |
| 24    | Pailin           | 5,741                | 3.400               | 19,520         | 1,122                  | 3.900               | 4,376          | 6,863                  | 3.482               | 23,896         |
| Total |                  | 2,372,519            | 2.760               | 6,548,709      | 404,804                | 4.201               | 1,700,743      | 2,777,323              | 2.970               | 8,249,452      |

**Quantities of Rice Grain Production in Rainy Season 2011 and Dried Season 2011-2012**

| No            | Cities/Provinces | Rainy Season 2011  |                      |                     |                | Dried Season 2011-2012 |                      |                     |                | Annual Total 2011-2012 |                      |                     |                |
|---------------|------------------|--------------------|----------------------|---------------------|----------------|------------------------|----------------------|---------------------|----------------|------------------------|----------------------|---------------------|----------------|
|               |                  | Growing Areas (ha) | Harvested Areas (ha) | Efficiencies (t/ha) | Quantities (t) | Growing Areas (ha)     | Harvested Areas (ha) | Efficiencies (t/ha) | Quantities (t) | Growing Areas (ha)     | Harvested Areas (ha) | Efficiencies (t/ha) | Quantities (t) |
| 1             | Banteay Meanchey | 232,720            | 215,491              | 2.876               | 619,753        | 3,560                  | 3,560                | 3.822               | 13,605         | 236,280                | 219,051              | 2.891               | 633,358        |
| 2             | Battam Bang      | 286,207            | 256,984              | 2.911               | 748,078        | 8,636                  | 8,636                | 4.316               | 37,273         | 294,843                | 265,620              | 2.957               | 785,351        |
| 3             | Kampong Cham     | 168,219            | 158,251              | 3.474               | 549,690        | 52,635                 | 52,635               | 4.302               | 226,418        | 220,854                | 210,886              | 3.680               | 776,108        |
| 4             | Kampong Chhnang  | 111,477            | 100,311              | 2.898               | 290,684        | 36,030                 | 36,030               | 4.400               | 158,532        | 147,507                | 136,341              | 3.295               | 449,216        |
| 5             | Kampong Speu     | 114,239            | 114,186              | 3.110               | 355,080        | 794                    | 794                  | 3.190               | 2,533          | 115,033                | 114,980              | 3.110               | 357,613        |
| 6             | Kampong Thom     | 220,730            | 156,460              | 2.310               | 361,423        | 42,856                 | 42,856               | 4.379               | 187,648        | 263,586                | 199,316              | 2.755               | 549,071        |
| 7             | KamPot           | 135,211            | 131,957              | 3.070               | 405,108        | 6,015                  | 6,015                | 3.900               | 23,458         | 141,226                | 137,972              | 3.106               | 428,566        |
| 8             | Kandal           | 40,991             | 35,221               | 3.119               | 109,855        | 68,234                 | 68,234               | 4.169               | 284,468        | 109,225                | 103,455              | 3.812               | 394,323        |
| 9             | Koh Kong         | 9,406              | 9,406                | 2.681               | 25,215         | 15                     | 15                   | 3.100               | 47             | 9,421                  | 9,421                | 2.681               | 25,262         |
| 10            | Kratie           | 30,835             | 28,283               | 2.760               | 78,061         | 14,603                 | 14,603               | 4.020               | 58,711         | 45,438                 | 42,886               | 3.189               | 136,772        |
| 11            | Mondul kiri      | 22,031             | 22,031               | 2.620               | 57,721         | –                      | –                    | –                   | –              | 22,031                 | 22,031               | 2.620               | 57,721         |
| 12            | Phnom Penh       | 11,431             | 10,750               | 2.800               | 30,100         | 1,427                  | 1,427                | 3.500               | 4,994          | 12,858                 | 12,177               | 2.882               | 35,094         |
| 13            | Preah Vihear     | 55,983             | 54,005               | 2.685               | 145,004        | 101                    | 101                  | 3.000               | 303            | 56,084                 | 54,106               | 2.686               | 145,307        |
| 14            | Prey Veng        | 272,792            | 257,107              | 2.905               | 746,828        | 88,480                 | 88,353               | 4.606               | 406,954        | 361,272                | 345,460              | 3.340               | 1,153,782      |
| 15            | Pursat           | 103,431            | 85,491               | 3.050               | 260,748        | 11,413                 | 11,413               | 4.177               | 47,674         | 114,844                | 96,904               | 3.183               | 308,422        |
| 16            | Ratana Kiri      | 27,695             | 27,695               | 2.600               | 72,004         | –                      | –                    | –                   | –              | 27,695                 | 27,695               | 2.600               | 72,004         |
| 17            | Siemreap         | 179,710            | 167,885              | 2.847               | 477,926        | 17,100                 | 17,100               | 3.894               | 66,587         | 196,810                | 184,985              | 2.944               | 544,513        |
| 18            | Preah Sihanouk   | 14,055             | 14,055               | 2.758               | 38,764         | –                      | –                    | –                   | –              | 14,055                 | 14,055               | 2.758               | 38,764         |
| 19            | Stung Treng      | 26,267             | 25,897               | 2.915               | 75,490         | –                      | –                    | –                   | –              | 26,267                 | 25,897               | 2.915               | 75,490         |
| 20            | Svay Rieng       | 165,722            | 160,693              | 2.550               | 409,767        | 23,068                 | 23,068               | 4.150               | 95,732         | 188,790                | 183,761              | 2.751               | 505,499        |
| 21            | Takeo            | 194,955            | 190,813              | 3.403               | 649,345        | 94,858                 | 94,858               | 4.804               | 455,686        | 289,813                | 285,671              | 3.868               | 1,105,031      |
| 22            | Oddar Meanchey   | 63,400             | 62,750               | 2.600               | 163,150        | 231                    | 231                  | 3.582               | 828            | 63,631                 | 62,981               | 2.604               | 163,977        |
| 23            | Kep              | 3,280              | 3,280                | 3.173               | 10,408         | 50                     | 50                   | 4.900               | 245            | 3,330                  | 3,330                | 3.199               | 10,653         |
| 24            | Pailin           | 5,782              | 5,782                | 3.500               | 20,237         | 1,854                  | 1,854                | 3.900               | 7,231          | 7,636                  | 7,636                | 3.597               | 27,468         |
| Total         |                  | 2,496,569          | 2,294,784            | 2.920               | 6,700,439      | 471,960                | 471,833              | 4.406               | 2,078,926      | 2,968,529              | 2,766,617            | 3.173               | 8,779,365      |
| Previous Year |                  | 2,391,016          | 2,372,519            | 2.760               | 6,548,709      | 404,876                | 404,804              | 4.201               | 1,700,743      | 2,795,892              | 2,777,323            | 2.97                | 8,249,452      |
| Comparison    |                  | 105,553            | -77,735              | 0.160               | 151,730        | 67,084                 | 67,029               | 0.205               | 378,183        | 172,637                | -10,706              | 0.203               | 529,913        |

### Quantities of Rice Grain Production in Rainy Season 2012 and Dried Season 2012-2013

| No            | Cities/Provinces | Rainy Season 2012  |                      |                     |                | Dried Season 2012-2013 |                      |                     |                | Annual Total 2012-2013 |                      |                     |                |
|---------------|------------------|--------------------|----------------------|---------------------|----------------|------------------------|----------------------|---------------------|----------------|------------------------|----------------------|---------------------|----------------|
|               |                  | Growing Areas (ha) | Harvested Areas (ha) | Effeciencies (t/ha) | Quantities (t) | Growing Areas (ha)     | Harvested Areas (ha) | Efficiencies (t/ha) | Quantities (t) | Growing Areas (ha)     | Harvested Areas (ha) | Efficiencies (t/ha) | Quantities (t) |
| 1             | Banteay Meanchey | 235,003            | 220,492              | 2.611               | 575,595        | 8,386                  | 8,386                | 3.913               | 32,817         | 243,389                | 228,878              | 2.658               | 608,412        |
| 2             | Battam Bang      | 285,134            | 277,238              | 2.810               | 778,944        | 26,619                 | 26,619               | 3.863               | 102,829        | 311,753                | 303,857              | 2.902               | 881,773        |
| 3             | Kampong Cham     | 165,500            | 165,500              | 3.355               | 555,277        | 53,368                 | 53,368               | 4.243               | 226,440        | 218,868                | 218,868              | 3.572               | 781,717        |
| 4             | Kampong Chhnang  | 121,505            | 121,499              | 3.001               | 364,670        | 34,618                 | 34,618               | 4.001               | 138,517        | 156,123                | 156,117              | 3.223               | 503,187        |
| 5             | Kampong Speu     | 113,977            | 113,657              | 3.013               | 342,450        | 388                    | 388                  | 3.451               | 1,339          | 114,365                | 114,045              | 3.015               | 343,789        |
| 6             | Kampong Thom     | 210,267            | 210,267              | 2.410               | 506,755        | 41,330                 | 41,330               | 4.395               | 181,645        | 251,597                | 251,597              | 2.736               | 688,400        |
| 7             | KamPot           | 131,200            | 131,200              | 3.036               | 398,375        | 9,157                  | 9,157                | 4.327               | 39,623         | 140,357                | 140,357              | 3.121               | 437,998        |
| 8             | Kandal           | 42,118             | 42,118               | 3.086               | 129,965        | 65,775                 | 65,733               | 4.108               | 270,056        | 107,893                | 107,851              | 3.709               | 400,021        |
| 9             | Koh Kong         | 9,823              | 9,823                | 2.737               | 26,883         | 20                     | 20                   | 3.200               | 64             | 9,843                  | 9,843                | 2.738               | 26,947         |
| 10            | Kratie           | 32,807             | 32,807               | 2.852               | 93,578         | 14,086                 | 14,086               | 4.377               | 61,658         | 46,893                 | 46,893               | 3.310               | 155,236        |
| 11            | Mondul kiri      | 22,669             | 20,027               | 2.286               | 45,782         | –                      | –                    | –                   | –              | 22,669                 | 20,027               | 2.286               | 45,782         |
| 12            | Phnom Penh       | 11,783             | 11,481               | 2.831               | 32,503         | 1,438                  | 1,438                | 3.501               | 5,034          | 13,221                 | 12,919               | 2.906               | 37,537         |
| 13            | Preah Vihear     | 59,859             | 59,727               | 2.723               | 162,653        | 154                    | 154                  | 3.649               | 562            | 60,013                 | 59,881               | 2.726               | 163,215        |
| 14            | Prey Veng        | 267,963            | 267,963              | 2.895               | 775,865        | 90,954                 | 90,954               | 4.602               | 418,567        | 358,917                | 358,917              | 3.328               | 1,194,432      |
| 15            | Pursat           | 108,960            | 108,327              | 3.350               | 362,895        | 12,955                 | 12,955               | 4.100               | 53,116         | 121,915                | 121,282              | 3.430               | 416,011        |
| 16            | Ratana Kiri      | 27,623             | 27,623               | 2.391               | 66,047         | –                      | –                    | –                   | –              | 27,623                 | 27,623               | 2.391               | 66,047         |
| 17            | Siemreap         | 181,475            | 181,180              | 2.737               | 495,801        | 17,520                 | 17,520               | 3.620               | 63,430         | 198,995                | 198,700              | 2.814               | 559,231        |
| 18            | Preah Sihanouk   | 16,070             | 16,070               | 3.126               | 50,235         | –                      | –                    | –                   | –              | 16,070                 | 16,070               | 3.126               | 50,235         |
| 19            | Stung Treng      | 26,910             | 26,910               | 2.738               | 73,680         | –                      | –                    | –                   | –              | 26,910                 | 26,910               | 2.738               | 73,680         |
| 20            | Svay Rieng       | 166,720            | 166,551              | 2.610               | 434,698        | 20,829                 | 20,829               | 4.207               | 87,633         | 187,549                | 187,380              | 2.788               | 522,331        |
| 21            | Takeo            | 198,768            | 198,768              | 3.427               | 681,184        | 96,507                 | 96,507               | 4.829               | 466,010        | 295,275                | 295,275              | 3.885               | 1,147,194      |
| 22            | Oddar Meanchey   | 65,990             | 65,690               | 2.274               | 149,347        | 400                    | 400                  | 3.823               | 1,529          | 66,390                 | 66,090               | 2.283               | 150,876        |
| 23            | Kep              | 3,510              | 3,510                | 3.186               | 11,184         | 20                     | 20                   | 4.900               | 98             | 3,530                  | 3,530                | 3.196               | 11,282         |
| 24            | Pailin           | 6,404              | 6,404                | 3.400               | 21,773         | 983                    | 983                  | 3.900               | 3,834          | 7,387                  | 7,387                | 3.466               | 25,607         |
| Total         |                  | 2,512,038          | 2,484,832            | 2.872               | 7,136,139      | 495,507                | 495,465              | 4.349               | 2,154,801      | 3,007,545              | 2,980,297            | 3.117               | 9,290,940      |
| Previous Year |                  | 2,496,569          | 2,294,784            | 2.920               | 6,700,439      | 471,960                | 471,833              | 4.406               | 2,078,926      | 2,968,529              | 2,766,617            | 3.173               | 8,779,365      |
| Comparision   |                  | 15,469             | 190,048              | -0.048              | 435,700        | 23,547                 | 23,632               | -0.057              | 75,875         | 39,016                 | 213,680              | -0.056              | 511,575        |

**Quantities of Rice Grain Production in Rainy Season 2013 and Dried Season 2013-2014**

| No            | Cities/Provinces | Rainy Season 2013  |                      |                     |                | Dried Season 2013-2014 |                      |                     |                | Annual Total 2013-2014 |                      |                     |                |
|---------------|------------------|--------------------|----------------------|---------------------|----------------|------------------------|----------------------|---------------------|----------------|------------------------|----------------------|---------------------|----------------|
|               |                  | Growing Areas (ha) | Harvested Areas (ha) | Efficiencies (t/ha) | Quantities (t) | Growing Areas (ha)     | Harvested Areas (ha) | Efficiencies (t/ha) | Quantities (t) | Growing Areas (ha)     | Harvested Areas (ha) | Efficiencies (t/ha) | Quantities (t) |
| 1             | Banteay Meanchey | 230,632            | 206,998              | 2.821               | 584,007        | 12,398                 | 11,745               | 3.820               | 44,862         | 243,030                | 218,743              | 2.875               | 628,869        |
| 2             | Battam Bang      | 296,993            | 270,070              | 2.794               | 754,700        | 10,582                 | 10,564               | 3.873               | 40,911         | 307,575                | 280,634              | 2.835               | 795,611        |
| 3             | Kampong Cham     | 167,819            | 166,024              | 3.330               | 552,860        | 53,569                 | 53,569               | 4.245               | 227,422        | 221,388                | 219,593              | 3.553               | 780,282        |
| 4             | Kampong Chhnang  | 120,651            | 118,917              | 3.067               | 364,769        | 35,566                 | 35,446               | 4.138               | 146,689        | 156,217                | 154,363              | 3.313               | 511,458        |
| 5             | Kampong Speu     | 115,629            | 115,629              | 3.072               | 355,259        | 645                    | 640                  | 3.298               | 2,111          | 116,274                | 116,269              | 3.074               | 357,370        |
| 6             | Kampong Thom     | 215,191            | 210,090              | 2.428               | 509,998        | 41,540                 | 41,540               | 4.367               | 181,391        | 256,731                | 251,630              | 2.748               | 691,389        |
| 7             | KamPot           | 135,095            | 135,095              | 3.065               | 414,115        | 9,715                  | 9,715                | 4.131               | 40,130         | 144,810                | 144,810              | 3.137               | 454,245        |
| 8             | Kandal           | 41,110             | 40,861               | 3.097               | 126,541        | 65,058                 | 65,058               | 4.178               | 271,835        | 106,168                | 105,919              | 3.761               | 398,376        |
| 9             | Koh Kong         | 10,374             | 10,353               | 2.788               | 28,866         | –                      | –                    | –                   | –              | 10,374                 | 10,353               | 2.788               | 28,866         |
| 10            | Kratie           | 32,860             | 31,117               | 2.876               | 89,508         | 14,116                 | 14,083               | 4.257               | 59,946         | 46,976                 | 45,200               | 3.307               | 149,454        |
| 11            | Mondul kiri      | 22,920             | 22,893               | 2.481               | 56,798         | –                      | –                    | –                   | –              | 22,920                 | 22,893               | 2.481               | 56,798         |
| 12            | Phnom Penh       | 12,151             | 12,141               | 2.865               | 34,787         | 1,440                  | 1,440                | 3.500               | 5,040          | 13,591                 | 13,581               | 2.933               | 39,827         |
| 13            | Preah Vihear     | 77,622             | 74,394               | 2.870               | 213,540        | 75                     | 75                   | 2.907               | 218            | 77,697                 | 74,469               | 2.870               | 213,758        |
| 14            | Prey Veng        | 279,894            | 278,891              | 2.985               | 832,545        | 92,201                 | 92,201               | 4.646               | 428,366        | 372,095                | 371,092              | 3.398               | 1,260,911      |
| 15            | Pursat           | 110,783            | 104,453              | 3.331               | 347,951        | 9,963                  | 9,963                | 4.182               | 41,661         | 120,746                | 114,416              | 3.405               | 389,612        |
| 16            | Ratana Kiri      | 27,172             | 25,197               | 2.203               | 55,510         | –                      | –                    | –                   | –              | 27,172                 | 25,197               | 2.203               | 55,510         |
| 17            | Siemreap         | 183,845            | 179,065              | 2.760               | 494,271        | 18,440                 | 18,040               | 3.650               | 65,838         | 202,285                | 197,105              | 2.842               | 560,109        |
| 18            | Preah Sihanouk   | 16,483             | 16,483               | 2.950               | 48,625         | –                      | –                    | –                   | –              | 16,483                 | 16,483               | 2.950               | 48,625         |
| 19            | Stung Treng      | 27,664             | 25,288               | 2.570               | 64,990         | 141                    | 141                  | 3.496               | 493            | 27,805                 | 25,429               | 2.575               | 65,483         |
| 20            | Svay Rieng       | 166,549            | 166,313              | 2.726               | 453,338        | 20,422                 | 20,400               | 4.209               | 85,864         | 186,971                | 186,713              | 2.888               | 539,202        |
| 21            | Takeo            | 201,566            | 201,566              | 3.447               | 694,847        | 96,532                 | 96,532               | 4.834               | 466,632        | 298,098                | 298,098              | 3.896               | 1,161,479      |
| 22            | Oddar Meanchey   | 64,705             | 63,921               | 2.524               | 161,311        | 600                    | 600                  | 4.500               | 2,700          | 65,305                 | 64,521               | 2.542               | 164,011        |
| 23            | Kep              | 3,530              | 3,530                | 3.213               | 11,342         | 20                     | 20                   | 3.609               | 72             | 3,550                  | 3,550                | 3.215               | 11,414         |
| 24            | Pailin           | 6,485              | 6,232                | 3.333               | 20,773         | 1,674                  | 1,674                | 3.900               | 6,529          | 8,159                  | 7,906                | 3.453               | 27,302         |
| Total         |                  | 2,567,723          | 2,485,521            | 2.925               | 7,271,251      | 484,697                | 483,446              | 4.383               | 2,118,710      | 3,052,420              | 2,968,967            | 3.163               | 9,389,961      |
| Previous Year |                  | 2,512,038          | 2,484,832            | 2.872               | 7,136,139      | 495,507                | 495,465              | 4.349               | 2,154,801      | 3,007,545              | 2,980,297            | 3.117               | 9,290,940      |
| Comparision   |                  | 55,685             | 689                  | 0.054               | 135,112        | -10,810                | -12,019              | 0.033               | -36,091        | 44,875                 | -11,331              | 0.045               | 99,021         |

**Quantities of Rice Grain Production in Rainy Season 2014 and Dried Season 2014-2015**

| No                   | Cities/Provinces | Rainy Season 2014  |                      |                     |                  | Dried Season 2014-2015 |                      |                     |                  | Annual Total 2014-2015 |                      |                     |                  |
|----------------------|------------------|--------------------|----------------------|---------------------|------------------|------------------------|----------------------|---------------------|------------------|------------------------|----------------------|---------------------|------------------|
|                      |                  | Growing Areas (ha) | Harvested Areas (ha) | Efficiencies (t/ha) | Quantities (t)   | Growing Areas (ha)     | Harvested Areas (ha) | Efficiencies (t/ha) | Quantities (t)   | Growing Areas (ha)     | Harvested Areas (ha) | Efficiencies (t/ha) | Quantities (t)   |
| 1                    | Banteay Meanchey | 243,725            | 240,001              | 2.659               | 638,234          | 14,903                 | 14,903               | 4.099               | 61,092           | 258,628                | 254,904              | 2.743               | 699,326          |
| 2                    | Battam Bang      | 295,061            | 285,351              | 2.525               | 720,509          | 11,769                 | 11,738               | 3.888               | 45,634           | 306,830                | 297,089              | 2.579               | 766,143          |
| 3                    | Kampong Cham     | 87,221             | 86,633               | 3.319               | 287,514          | 43,339                 | 43,339               | 4.160               | 180,309          | 130,560                | 129,972              | 3.599               | 467,823          |
| 4                    | Kampong Chhnang  | 121,653            | 121,135              | 2.869               | 347,531          | 36,248                 | 36,226               | 4.536               | 164,327          | 157,901                | 157,361              | 3.253               | 511,858          |
| 5                    | Kampong Speu     | 107,766            | 107,766              | 2.850               | 307,184          | 507                    | 507                  | 3.223               | 1,634            | 108,273                | 108,273              | 2.852               | 308,818          |
| 6                    | Kampong Thom     | 213,081            | 211,424              | 2.484               | 525,259          | 46,189                 | 46,189               | 4.330               | 200,008          | 259,270                | 257,613              | 2.815               | 725,267          |
| 7                    | KamPot           | 136,398            | 136,398              | 3.051               | 416,209          | 5,225                  | 5,225                | 3.922               | 20,495           | 141,623                | 141,623              | 3.084               | 436,704          |
| 8                    | Kandal           | 40,018             | 38,940               | 3.151               | 122,714          | 66,345                 | 66,345               | 4.223               | 280,180          | 106,363                | 105,285              | 3.827               | 402,895          |
| 9                    | Koh Kong         | 10,401             | 10,401               | 2.791               | 29,031           | –                      | –                    | –                   | –                | 10,401                 | 10,401               | 2.791               | 29,031           |
| 10                   | Kratie           | 32,875             | 31,226               | 2.757               | 86,101           | 14,545                 | 14,545               | 4.263               | 62,006           | 47,420                 | 45,771               | 3.236               | 148,107          |
| 11                   | Mondul kiri      | 23,023             | 22,730               | 2.379               | 54,068           | –                      | –                    | –                   | –                | 23,023                 | 22,730               | 2.379               | 54,068           |
| 12                   | Phnom Penh       | 11,288             | 11,276               | 2.802               | 31,595           | 1,441                  | 1,441                | 3.500               | 5,044            | 12,729                 | 12,717               | 2.881               | 36,639           |
| 13                   | Preah Vihear     | 76,568             | 74,413               | 2.812               | 209,250          | 18                     | 18                   | 3.000               | 54               | 76,586                 | 74,431               | 2.812               | 209,304          |
| 14                   | Prey Veng        | 272,532            | 272,532              | 2.996               | 816,581          | 92,246                 | 92,246               | 4.780               | 440,964          | 364,778                | 364,778              | 3.447               | 1,257,545        |
| 15                   | Pursat           | 111,106            | 107,998              | 3.128               | 337,834          | 11,686                 | 11,686               | 4.178               | 48,819           | 122,792                | 119,684              | 3.231               | 386,653          |
| 16                   | Ratana Kiri      | 26,066             | 25,918               | 2.448               | 63,453           | –                      | –                    | –                   | –                | 26,066                 | 25,918               | 2.448               | 63,453           |
| 17                   | Siemreap         | 184,035            | 184,035              | 2.633               | 484,615          | 17,775                 | 17,775               | 3.783               | 67,239           | 201,810                | 201,810              | 2.735               | 551,854          |
| 18                   | Preah Sihanouk   | 16,567             | 16,567               | 2.830               | 46,885           | –                      | –                    | –                   | –                | 16,567                 | 16,567               | 2.830               | 46,885           |
| 19                   | Stung Treng      | 27,851             | 26,884               | 2.710               | 72,855           | 76                     | 76                   | 3.500               | 266              | 27,927                 | 26,960               | 2.712               | 73,121           |
| 20                   | Svay Rieng       | 166,756            | 166,519              | 2.741               | 456,367          | 19,967                 | 19,945               | 4.274               | 85,253           | 186,723                | 186,464              | 2.905               | 541,620          |
| 21                   | Takeo            | 199,605            | 199,605              | 3.235               | 645,623          | 97,134                 | 97,134               | 4.840               | 470,099          | 296,739                | 296,739              | 3.760               | 1,115,722        |
| 22                   | Oddar Meanchey   | 72,000             | 71,525               | 2.095               | 149,847          | 449                    | 449                  | 3.570               | 1,603            | 72,449                 | 71,974               | 2.104               | 151,450          |
| 23                   | Kep              | 3,469              | 3,469                | 3.252               | 11,281           | 37                     | 37                   | 3.703               | 137              | 3,506                  | 3,506                | 3.257               | 11,418           |
| 24                   | Pailin           | 6,497              | 6,341                | 2.912               | 18,465           | 783                    | 783                  | 3.600               | 2,819            | 7,280                  | 7,124                | 2.988               | 21,284           |
| 25                   | Tboung Khmum     | 79,010             | 78,889               | 3.353               | 264,515          | 10,253                 | 10,253               | 4.185               | 42,913           | 89,263                 | 89,142               | 3.449               | 307,428          |
| <b>Total</b>         |                  | <b>2,564,572</b>   | <b>2,537,976</b>     | <b>2.815</b>        | <b>7,143,521</b> | <b>490,935</b>         | <b>490,860</b>       | <b>4.443</b>        | <b>2,180,896</b> | <b>3,055,507</b>       | <b>3,028,836</b>     | <b>3.079</b>        | <b>9,324,416</b> |
| <b>Previous Year</b> |                  | <b>2,567,723</b>   | <b>2,485,521</b>     | <b>2.925</b>        | <b>7,271,251</b> | <b>484,697</b>         | <b>483,446</b>       | <b>4.383</b>        | <b>2,118,710</b> | <b>3,052,420</b>       | <b>2,968,967</b>     | <b>3.163</b>        | <b>9,389,961</b> |
| <b>Comparision</b>   |                  | <b>-3,151</b>      | <b>52,456</b>        | <b>-0.111</b>       | <b>-127,730</b>  | <b>6,238</b>           | <b>7,414</b>         | <b>0.060</b>        | <b>62,186</b>    | <b>3,087</b>           | <b>59,870</b>        | <b>-0.084</b>       | <b>-65,545</b>   |



**Quantities of Rice Grain Production in Rainy Season 2015 and Dried Season 2015-2016**

| No            | Cities/Provinces | Rainy Season 2015  |                      |                     |                | Dried Season 2015-2016 |                      |                     |                | Annual Total 2015-2016 |                      |                     |                |
|---------------|------------------|--------------------|----------------------|---------------------|----------------|------------------------|----------------------|---------------------|----------------|------------------------|----------------------|---------------------|----------------|
|               |                  | Growing Areas (ha) | Harvested Areas (ha) | Efficiencies (t/ha) | Quantities (t) | Growing Areas (ha)     | Harvested Areas (ha) | Efficiencies (t/ha) | Quantities (t) | Growing Areas (ha)     | Harvested Areas (ha) | Efficiencies (t/ha) | Quantities (t) |
| 1             | Banteay Meanchey | 246,021            | 235,222              | 2.606               | 613,028        | 22,927                 | 22,927               | 4.261               | 97,692         | 268,948                | 258,149              | 2.753               | 710,720        |
| 2             | Battam Bang      | 290,056            | 279,123              | 2.860               | 798,292        | 15,836                 | 15,836               | 3.992               | 63,214         | 305,892                | 294,959              | 2.921               | 861,506        |
| 3             | Kampong Cham     | 87,146             | 87,146               | 3.220               | 280,624        | 31,642                 | 31,642               | 4.174               | 132,068        | 118,788                | 118,788              | 3.474               | 412,692        |
| 4             | Kampong Chhnang  | 122,581            | 122,483              | 2.834               | 347,153        | 34,125                 | 34,125               | 4.283               | 146,171        | 156,706                | 156,608              | 3.150               | 493,324        |
| 5             | Kampong Speu     | 112,647            | 112,625              | 3.006               | 338,566        | 310                    | 310                  | 3.390               | 1,051          | 112,957                | 112,935              | 3.007               | 339,617        |
| 6             | Kampong Thom     | 213,426            | 213,426              | 2.480               | 529,296        | 43,998                 | 43,998               | 4.408               | 193,932        | 257,424                | 257,424              | 2.809               | 723,228        |
| 7             | KamPot           | 136,537            | 136,537              | 3.150               | 430,092        | 9,737                  | 9,737                | 4.100               | 39,922         | 146,274                | 146,274              | 3.213               | 470,014        |
| 8             | Kandal           | 35,280             | 35,280               | 3.088               | 108,949        | 55,581                 | 55,581               | 4.216               | 234,335        | 90,861                 | 90,861               | 3.778               | 343,284        |
| 9             | Koh Kong         | 10,405             | 10,405               | 2.850               | 29,659         | –                      | –                    | –                   | –              | 10,405                 | 10,405               | 2.850               | 29,659         |
| 10            | Kratie           | 32,286             | 32,286               | 2.672               | 86,263         | 13,338                 | 13,338               | 4.186               | 55,827         | 45,624                 | 45,624               | 3.114               | 142,090        |
| 11            | Mondul kiri      | 22,929             | 22,929               | 2.368               | 54,289         | –                      | –                    | –                   | –              | 22,929                 | 22,929               | 2.368               | 54,289         |
| 12            | Phnom Penh       | 11,153             | 11,153               | 2.873               | 32,043         | 1,120                  | 1,120                | 3.501               | 3,921          | 12,273                 | 12,273               | 2.930               | 35,964         |
| 13            | Preah Vihear     | 83,388             | 83,388               | 2.751               | 229,363        | 18                     | 18                   | 3.000               | 54             | 83,406                 | 83,406               | 2.751               | 229,417        |
| 14            | Prey Veng        | 268,315            | 268,315              | 2.996               | 803,983        | 95,909                 | 95,909               | 4.822               | 462,443        | 364,224                | 364,224              | 3.477               | 1,266,426      |
| 15            | Pursat           | 108,329            | 105,593              | 3.034               | 320,369        | 14,072                 | 14,072               | 4.178               | 58,793         | 122,401                | 119,665              | 3.169               | 379,162        |
| 16            | Ratana Kiri      | 26,018             | 26,018               | 2.025               | 52,680         | 4                      | 4                    | 3.250               | 13             | 26,022                 | 26,022               | 2.025               | 52,693         |
| 17            | Siemreap         | 186,050            | 185,220              | 2.527               | 468,109        | 20,985                 | 20,985               | 3.401               | 71,377         | 207,035                | 206,205              | 2.616               | 539,486        |
| 18            | Preah Sihanouk   | 16,614             | 16,614               | 2.750               | 45,689         | –                      | –                    | –                   | –              | 16,614                 | 16,614               | 2.750               | 45,689         |
| 19            | Stung Treng      | 28,689             | 28,689               | 2.600               | 74,591         | 58                     | 58                   | 3.500               | 203            | 28,747                 | 28,747               | 2.602               | 74,794         |
| 20            | Svay Rieng       | 167,946            | 167,658              | 2.650               | 444,294        | 19,947                 | 19,947               | 4.230               | 84,378         | 187,893                | 187,605              | 2.818               | 528,672        |
| 21            | Takeo            | 197,234            | 197,234              | 3.282               | 647,351        | 98,609                 | 98,609               | 4.859               | 479,119        | 295,843                | 295,843              | 3.808               | 1,126,470      |
| 22            | Oddar Meanchey   | 72,000             | 72,000               | 2.200               | 158,400        | 150                    | 150                  | 3.500               | 525            | 72,150                 | 72,150               | 2.203               | 158,925        |
| 23            | Kep              | 3,588              | 3,588                | 3.227               | 11,578         | 32                     | 32                   | 3.781               | 121            | 3,620                  | 3,620                | 3.232               | 11,699         |
| 24            | Pailin           | 5,001              | 4,925                | 2.600               | 12,805         | 682                    | 682                  | 3.400               | 2,319          | 5,683                  | 5,607                | 2.697               | 15,124         |
| 25            | Tboung Khmum     | 78,318             | 78,318               | 3.233               | 253,218        | 10,375                 | 10,375               | 3.578               | 37,122         | 88,693                 | 88,693               | 3.274               | 290,340        |
| Total         |                  | 2,561,957          | 2,536,175            | 2.827               | 7,170,684      | 489,455                | 489,455              | 4.422               | 2,164,600      | 3,051,412              | 3,025,630            | 3.085               | 9,335,284      |
| Previous Year |                  | 2,564,572          | 2,537,976            | 2.815               | 7,143,521      | 490,935                | 490,860              | 4.443               | 2,180,896      | 3,055,507              | 3,028,836            | 3.079               | 9,324,416      |
| Comparision   |                  | -2,615             | -1,801               | 0.013               | 27,163         | -1,480                 | -1,405               | -0.021              | -16,296        | -4,095                 | -3,206               | 0.007               | 10,868         |

**Quantities of Rice Grain Production in Rainy Season 2016 and Dried Season 2016-2017**

| No                   | Cities/Provinces | Rainy Season 2016  |                      |                     |                  | Dried Season 2016-2017 |                      |                     |                  | Annual Total 2016-2017 |                      |                     |                  |
|----------------------|------------------|--------------------|----------------------|---------------------|------------------|------------------------|----------------------|---------------------|------------------|------------------------|----------------------|---------------------|------------------|
|                      |                  | Growing Areas (ha) | Harvested Areas (ha) | Efficiencies (t/ha) | Quantities (t)   | Growing Areas (ha)     | Harvested Areas (ha) | Efficiencies (t/ha) | Quantities (t)   | Growing Areas (ha)     | Harvested Areas (ha) | Efficiencies (t/ha) | Quantities (t)   |
| 1                    | Banteay Meanchey | 247,015            | 242,503              | 2.805               | 680,257          | 22,336                 | 22,336               | 4.412               | 98,548           | 269,351                | 264,839              | 2.941               | 778,805          |
| 2                    | Battam Bang      | 289,567            | 278,837              | 3.087               | 860,636          | 19,281                 | 19,281               | 4.014               | 77,396           | 308,848                | 298,118              | 3.147               | 938,032          |
| 3                    | Kampong Cham     | 89,861             | 89,861               | 3.483               | 312,953          | 43,457                 | 43,457               | 4.175               | 181,431          | 133,318                | 133,318              | 3.708               | 494,384          |
| 4                    | Kampong Chhnang  | 124,409            | 124,364              | 3.042               | 378,271          | 37,244                 | 37,184               | 4.498               | 167,261          | 161,653                | 161,548              | 3.377               | 545,532          |
| 5                    | Kampong Speu     | 115,116            | 114,329              | 3.025               | 345,822          | 477                    | 477                  | 3.415               | 1,629            | 115,593                | 114,806              | 3.026               | 347,451          |
| 6                    | Kampong Thom     | 215,526            | 215,526              | 2.585               | 557,066          | 51,751                 | 51,751               | 4.435               | 229,507          | 267,277                | 267,277              | 2.943               | 786,573          |
| 7                    | KamPot           | 138,388            | 138,388              | 3.160               | 437,263          | 8,702                  | 8,702                | 4.415               | 38,419           | 147,090                | 147,090              | 3.234               | 475,682          |
| 8                    | Kandal           | 35,329             | 34,587               | 3.125               | 108,080          | 60,970                 | 60,970               | 4.303               | 262,357          | 96,299                 | 95,557               | 3.877               | 370,437          |
| 9                    | Koh Kong         | 10,503             | 10,503               | 2.638               | 27,705           | –                      | –                    | –                   | –                | 10,503                 | 10,503               | 2.638               | 27,705           |
| 10                   | Kratie           | 33,072             | 33,072               | 2.754               | 91,066           | 14,024                 | 14,024               | 4.293               | 60,200           | 47,096                 | 47,096               | 3.212               | 151,266          |
| 11                   | Mondul kiri      | 23,608             | 23,608               | 2.736               | 64,591           | –                      | –                    | –                   | –                | 23,608                 | 23,608               | 2.736               | 64,591           |
| 12                   | Phnom Penh       | 10,291             | 9,284                | 2.855               | 26,508           | 913                    | 913                  | 3.499               | 3,195            | 11,204                 | 10,197               | 2.913               | 29,703           |
| 13                   | Preah Vihear     | 82,398             | 82,398               | 2.931               | 241,536          | 20                     | 20                   | 3.000               | 60               | 82,418                 | 82,418               | 2.931               | 241,596          |
| 14                   | Prey Veng        | 270,111            | 270,111              | 3.021               | 815,969          | 91,195                 | 91,195               | 4.843               | 441,664          | 361,306                | 361,306              | 3.481               | 1,257,633        |
| 15                   | Pursat           | 115,984            | 115,851              | 3.222               | 373,325          | 16,186                 | 16,186               | 4.348               | 70,370           | 132,170                | 132,037              | 3.360               | 443,695          |
| 16                   | Ratana Kiri      | 26,185             | 26,185               | 2.493               | 65,285           | –                      | –                    | –                   | –                | 26,185                 | 26,185               | 2.493               | 65,285           |
| 17                   | Siemreap         | 186,735            | 186,545              | 2.598               | 484,707          | 21,740                 | 21,740               | 3.436               | 74,707           | 208,475                | 208,285              | 2.866               | 559,414          |
| 18                   | Preah Sihanouk   | 16,605             | 16,605               | 2.862               | 47,529           | –                      | –                    | –                   | –                | 16,605                 | 16,605               | 2.862               | 47,529           |
| 19                   | Stung Treng      | 28,678             | 28,678               | 2.745               | 78,721           | 6                      | 6                    | 3.500               | 21               | 28,684                 | 28,684               | 2.745               | 78,742           |
| 20                   | Svay Rieng       | 168,528            | 168,356              | 2.833               | 476,894          | 20,330                 | 20,330               | 4.233               | 86,061           | 188,858                | 188,686              | 2.984               | 562,955          |
| 21                   | Takeo            | 197,444            | 197,431              | 3.324               | 656,245          | 98,670                 | 98,670               | 4.861               | 479,606          | 296,114                | 296,101              | 3.836               | 1,135,851        |
| 22                   | Oddar Meanchey   | 86,501             | 86,501               | 2.561               | 221,507          | 47                     | 47                   | 3.500               | 165              | 86,548                 | 86,548               | 2.561               | 221,672          |
| 23                   | Kep              | 3,597              | 3,597                | 3.247               | 11,680           | 35                     | 35                   | 3.714               | 130              | 3,632                  | 3,632                | 3.252               | 11,810           |
| 24                   | Pailin           | 5,825              | 5,825                | 2.900               | 16,893           | 665                    | 665                  | 3.301               | 2,195            | 6,490                  | 6,490                | 2.941               | 19,088           |
| 25                   | Tboung Khmum     | 78,310             | 78,310               | 3.274               | 256,397          | 10,525                 | 10,525               | 3.842               | 40,442           | 88,835                 | 88,835               | 3.341               | 296,839          |
| <b>Total</b>         |                  | <b>2,599,586</b>   | <b>2,581,255</b>     | <b>2.959</b>        | <b>7,636,906</b> | <b>518,574</b>         | <b>518,514</b>       | <b>4.465</b>        | <b>2,315,364</b> | <b>3,118,160</b>       | <b>3,099,769</b>     | <b>3.211</b>        | <b>9,952,270</b> |
| <b>Previous Year</b> |                  | <b>2,561,957</b>   | <b>2,536,175</b>     | <b>2.827</b>        | <b>7,170,684</b> | <b>489,455</b>         | <b>489,455</b>       | <b>4.422</b>        | <b>2,164,600</b> | <b>3,051,412</b>       | <b>3,025,630</b>     | <b>3.085</b>        | <b>9,335,284</b> |
| <b>Comparision</b>   |                  | <b>37,629</b>      | <b>45,080</b>        | <b>0.131</b>        | <b>466,222</b>   | <b>29,119</b>          | <b>29,059</b>        | <b>0.043</b>        | <b>150,764</b>   | <b>66,748</b>          | <b>74,139</b>        | <b>0.125</b>        | <b>616,986</b>   |

**Quantities of Rice Grain Production in Rainy Season 2017 and Dried Season 2017-2018**

| No            | Cities/Provinces | Rainy Season 2017  |                      |                     |                | Dried Season 2017-2018 |                      |                     |                | Annual Total 2017-2018 |                      |                     |                |
|---------------|------------------|--------------------|----------------------|---------------------|----------------|------------------------|----------------------|---------------------|----------------|------------------------|----------------------|---------------------|----------------|
|               |                  | Growing Areas (ha) | Harvested Areas (ha) | Effeciencies (t/ha) | Quantities (t) | Growing Areas (ha)     | Harvested Areas (ha) | Effeciencies (t/ha) | Quantities (t) | Growing Areas (ha)     | Harvested Areas (ha) | Effeciencies (t/ha) | Quantities (t) |
| 1             | Banteay Meanchey | 251,961            | 248,411              | 3.179               | 789,709        | 36,295                 | 36,295               | 4.554               | 165,288        | 288,256                | 284,706              | 3.354               | 954,997        |
| 2             | Battam Bang      | 333,598            | 324,624              | 3.282               | 1,065,353      | 20,538                 | 20,538               | 4.070               | 83,586         | 354,136                | 345,162              | 3.329               | 1,148,939      |
| 3             | Kampong Cham     | 91,564             | 91,564               | 3.517               | 321,988        | 43,496                 | 43,496               | 4.185               | 182,027        | 135,060                | 135,060              | 3.732               | 504,015        |
| 4             | Kampong Chhnang  | 126,443            | 126,443              | 3.096               | 391,469        | 37,662                 | 37,662               | 4.530               | 170,607        | 164,105                | 164,105              | 3.425               | 562,076        |
| 5             | Kampong Speu     | 113,711            | 113,711              | 3.035               | 345,083        | 634                    | 633                  | 3.381               | 2,140          | 114,345                | 114,344              | 3.037               | 347,223        |
| 6             | Kampong Thom     | 215,008            | 213,406              | 2.640               | 563,342        | 53,852                 | 53,852               | 4.445               | 239,361        | 268,860                | 267,258              | 3.003               | 802,703        |
| 7             | KamPot           | 138,399            | 138,399              | 3.163               | 437,814        | 9,062                  | 9,062                | 4.277               | 38,755         | 147,461                | 147,461              | 3.232               | 476,569        |
| 8             | Kandal           | 38,241             | 38,206               | 3.168               | 121,030        | 60,815                 | 60,690               | 4.414               | 267,887        | 99,056                 | 98,896               | 3.933               | 388,917        |
| 9             | Koh Kong         | 10,515             | 10,515               | 2.684               | 28,225         | -                      | -                    | -                   | -              | 10,515                 | 10,515               | 2.684               | 28,225         |
| 10            | Kratie           | 33,221             | 33,196               | 2.880               | 95,603         | 14,051                 | 14,051               | 4.382               | 61,571         | 47,272                 | 47,247               | 3.327               | 157,174        |
| 11            | Mondul kiri      | 24,500             | 24,500               | 2.865               | 70,182         | 114                    | 114                  | 4.202               | 479            | 24,614                 | 24,614               | 2.871               | 70,661         |
| 12            | Phnom Penh       | 10,307             | 10,290               | 2.738               | 28,174         | 987                    | 987                  | 3.501               | 3,455          | 11,294                 | 11,277               | 2.805               | 31,629         |
| 13            | Preah Vihear     | 85,839             | 85,839               | 2.935               | 251,974        | 22                     | 22                   | 3.000               | 66             | 85,861                 | 85,861               | 2.935               | 252,040        |
| 14            | Prey Veng        | 272,606            | 272,606              | 3.100               | 845,099        | 102,715                | 102,715              | 4.848               | 497,995        | 375,321                | 375,321              | 3.579               | 1,343,094      |
| 15            | Pursat           | 116,757            | 116,757              | 3.339               | 389,806        | 15,105                 | 14,324               | 4.349               | 62,296         | 131,862                | 131,081              | 3.449               | 452,102        |
| 16            | Ratana Kiri      | 26,107             | 26,107               | 2.323               | 60,655         | -                      | -                    | -                   | -              | 26,107                 | 26,107               | 2.323               | 60,655         |
| 17            | Siemreap         | 186,710            | 186,520              | 2.579               | 481,015        | 22,005                 | 22,005               | 3.579               | 78,754         | 208,715                | 208,525              | 2.684               | 559,769        |
| 18            | Preah Sihanouk   | 16,300             | 16,300               | 2.822               | 46,003         | -                      | -                    | -                   | -              | 16,300                 | 16,300               | 2.822               | 46,003         |
| 19            | Stung Treng      | 28,601             | 28,560               | 2.500               | 71,400         | 12                     | 12                   | 3.400               | 41             | 28,613                 | 28,572               | 2.500               | 71,441         |
| 20            | Svay Rieng       | 167,529            | 167,105              | 2.843               | 475,010        | 20,639                 | 20,639               | 4.222               | 87,134         | 188,168                | 187,744              | 2.994               | 562,144        |
| 21            | Takeo            | 199,116            | 198,438              | 3.340               | 662,779        | 99,391                 | 99,391               | 4.870               | 484,061        | 298,507                | 297,829              | 3.851               | 1,146,840      |
| 22            | Oddar Meanchey   | 82,415             | 82,415               | 2.593               | 213,736        | 15                     | 15                   | 3.533               | 53             | 82,430                 | 82,430               | 2.594               | 213,789        |
| 23            | Kep              | 3,610              | 3,610                | 3.311               | 11,951         | 30                     | 30                   | 3.900               | 117            | 3,640                  | 3,640                | 3.315               | 12,068         |
| 24            | Pailin           | 6,390              | 6,390                | 2.900               | 18,531         | 700                    | 700                  | 3.300               | 2,310          | 7,090                  | 7,090                | 2.939               | 20,841         |
| 25            | Tboung Khmum     | 78,320             | 77,725               | 3.382               | 262,866        | 10,615                 | 10,615               | 3.915               | 41,559         | 88,935                 | 88,340               | 3.446               | 304,425        |
| Total         |                  | 2,657,768          | 2,641,637            | 3.047               | 8,048,797      | 548,755                | 547,848              | 4.508               | 2,469,542      | 3,206,523              | 3,189,485            | 3.298               | 10,518,339     |
| Previous Year |                  | 2,599,586          | 2,581,255            | 2.959               | 7,636,906      | 518,574                | 518,514              | 4.465               | 2,315,364      | 3,118,160              | 3,099,769            | 3.211               | 9,952,270      |
| Comparision   |                  | 58,182             | 60,382               | 0.088               | 411,891        | 30,181                 | 29,334               | 0.042               | 154,178        | 88,363                 | 89,716               | 0.087               | 566,069        |



**Quantities of Rice Grain Production in Rainy Season 2018 and Dried Season 2018-2019**

| No                   | Cities/Provinces | Rainy Season 2018  |                      |                     |                  | Dried Season 2018-2019 |                      |                     |                  | Annual Total 2018-2019 |                      |                     |                   |
|----------------------|------------------|--------------------|----------------------|---------------------|------------------|------------------------|----------------------|---------------------|------------------|------------------------|----------------------|---------------------|-------------------|
|                      |                  | Growing Areas (ha) | Harvested Areas (ha) | Efficiencies (t/ha) | Quantities (t)   | Growing Areas (ha)     | Harvested Areas (ha) | Efficiencies (t/ha) | Quantities (t)   | Growing Areas (ha)     | Harvested Areas (ha) | Efficiencies (t/ha) | Quantities (t)    |
| 1                    | Banteay Meanchey | 254,310            | 245,602              | 3.137               | 770,430          | 47,625                 | 47,625               | 4.385               | 208,851          | 301,935                | 293,227              | 3.340               | 979,281           |
| 2                    | Battam Bang      | 365,859            | 333,063              | 3.484               | 1,160,291        | 21,514                 | 21,514               | 4.140               | 89,070           | 387,373                | 354,577              | 3.524               | 1,249,361         |
| 3                    | Kampong Cham     | 97,599             | 89,573               | 3.445               | 308,612          | 43,137                 | 42,707               | 4.207               | 179,680          | 140,736                | 132,280              | 3.691               | 488,292           |
| 4                    | Kampong Chhnang  | 126,618            | 126,127              | 3.288               | 414,667          | 38,716                 | 38,716               | 4.653               | 180,151          | 165,334                | 164,843              | 3.608               | 594,818           |
| 5                    | Kampong Speu     | 113,891            | 113,861              | 3.098               | 352,744          | 452                    | 452                  | 3.325               | 1,503            | 114,343                | 114,313              | 3.099               | 354,247           |
| 6                    | Kampong Thom     | 221,547            | 217,702              | 2.708               | 589,628          | 61,249                 | 61,249               | 4.493               | 275,217          | 282,796                | 278,951              | 3.100               | 864,845           |
| 7                    | KamPot           | 142,299            | 142,299              | 3.185               | 453,286          | 9,551                  | 9,551                | 4.232               | 40,420           | 151,850                | 151,850              | 3.251               | 493,706           |
| 8                    | Kandal           | 41,711             | 36,990               | 3.211               | 118,793          | 60,867                 | 60,867               | 4.420               | 269,057          | 102,578                | 97,857               | 3.963               | 387,850           |
| 9                    | Koh Kong         | 10,417             | 10,417               | 2.935               | 30,574           | –                      | –                    | –                   | –                | 10,417                 | 10,417               | 2.935               | 30,574            |
| 10                   | Kratie           | 33,499             | 33,222               | 2.794               | 92,834           | 14,059                 | 14,059               | 4.400               | 61,866           | 47,558                 | 47,281               | 3.272               | 154,700           |
| 11                   | Mondul kiri      | 25,554             | 25,554               | 2.838               | 72,522           | 107                    | 107                  | 4.252               | 455              | 25,661                 | 25,661               | 2.844               | 72,977            |
| 12                   | Phnom Penh       | 9,042              | 9,042                | 2.764               | 24,992           | 980                    | 980                  | 3.500               | 3,430            | 10,022                 | 10,022               | 2.836               | 28,422            |
| 13                   | Preah Vihear     | 90,005             | 88,043               | 2.903               | 255,589          | 21                     | 21                   | 3.000               | 63               | 90,026                 | 88,064               | 2.903               | 255,652           |
| 14                   | Prey Veng        | 274,676            | 273,793              | 3.197               | 875,452          | 113,043                | 113,043              | 4.854               | 548,711          | 387,719                | 386,836              | 3.682               | 1,424,163         |
| 15                   | Pursat           | 123,997            | 116,319              | 3.701               | 430,538          | 25,924                 | 25,159               | 4.200               | 105,668          | 149,921                | 141,478              | 3.790               | 536,206           |
| 16                   | Ratana Kiri      | 27,033             | 26,069               | 2.325               | 60,606           | –                      | –                    | –                   | –                | 27,033                 | 26,069               | 2.325               | 60,606            |
| 17                   | Siemreap         | 187,940            | 184,449              | 2.556               | 471,515          | 23,295                 | 21,870               | 3.401               | 74,373           | 211,235                | 206,319              | 2.646               | 545,888           |
| 18                   | Preah Sihanouk   | 12,239             | 12,213               | 3.200               | 39,079           | –                      | –                    | –                   | –                | 12,239                 | 12,213               | 3.200               | 39,079            |
| 19                   | Stung Treng      | 28,871             | 27,668               | 2.582               | 71,434           | –                      | –                    | –                   | –                | 28,871                 | 27,668               | 2.582               | 71,434            |
| 20                   | Svay Rieng       | 168,871            | 167,383              | 2.742               | 458,994          | 21,056                 | 20,940               | 4.250               | 88,995           | 189,927                | 188,323              | 2.910               | 547,989           |
| 21                   | Takeo            | 199,955            | 199,643              | 3.386               | 676,051          | 102,903                | 102,903              | 4.897               | 503,885          | 302,858                | 302,546              | 3.900               | 1,179,936         |
| 22                   | Oddar Meanchey   | 95,000             | 88,369               | 2.109               | 186,386          | 139                    | 139                  | 3.504               | 487              | 95,139                 | 88,508               | 2.111               | 186,873           |
| 23                   | Kep              | 3,623              | 3,623                | 3.344               | 12,115           | 15                     | 15                   | 3.733               | 56               | 3,638                  | 3,638                | 3.346               | 12,171            |
| 24                   | Pailin           | 6,390              | 6,390                | 2.900               | 18,531           | 830                    | 830                  | 3.300               | 2,739            | 7,220                  | 7,220                | 2.946               | 21,270            |
| 25                   | Tboung Khmum     | 78,500             | 76,900               | 3.475               | 267,230          | 11,000                 | 11,000               | 4.015               | 44,165           | 89,500                 | 87,900               | 3.543               | 311,395           |
| <b>Total</b>         |                  | <b>2,739,446</b>   | <b>2,654,314</b>     | <b>3.094</b>        | <b>8,212,893</b> | <b>596,483</b>         | <b>593,747</b>       | <b>4.512</b>        | <b>2,678,842</b> | <b>3,335,929</b>       | <b>3,248,061</b>     | <b>3.353</b>        | <b>10,891,735</b> |
| <b>Previous Year</b> |                  | <b>2,657,768</b>   | <b>2,641,637</b>     | <b>3.047</b>        | <b>8,048,797</b> | <b>548,755</b>         | <b>547,848</b>       | <b>4.508</b>        | <b>2,469,542</b> | <b>3,206,523</b>       | <b>3,189,485</b>     | <b>3.298</b>        | <b>10,518,339</b> |
| <b>Comparision</b>   |                  | <b>81,678</b>      | <b>12,677</b>        | <b>0.047</b>        | <b>164,096</b>   | <b>47,728</b>          | <b>45,899</b>        | <b>0.004</b>        | <b>209,300</b>   | <b>129,406</b>         | <b>58,576</b>        | <b>0.055</b>        | <b>373,396</b>    |

| Quantities of Rice Grain Production in Rainy Season 2019 and Dried Season 2019-2020 |                  |                    |                      |                     |                |                        |                      |                     |                |                        |                      |                     |                |
|-------------------------------------------------------------------------------------|------------------|--------------------|----------------------|---------------------|----------------|------------------------|----------------------|---------------------|----------------|------------------------|----------------------|---------------------|----------------|
| No                                                                                  | Cities/Provinces | Rainy Season 2019  |                      |                     |                | Dried Season 2019-2020 |                      |                     |                | Annual Total 2019-2020 |                      |                     |                |
|                                                                                     |                  | Growing Areas (ha) | Harvested Areas (ha) | Efficiencies (t/ha) | Quantities (t) | Growing Areas (ha)     | Harvested Areas (ha) | Efficiencies (t/ha) | Quantities (t) | Growing Areas (ha)     | Harvested Areas (ha) | Efficiencies (t/ha) | Quantities (t) |
| 1                                                                                   | Banteay Meanchey | 249,449            | 224,834              | 3.052               | 686,185        | 55,067                 | 55,067               | 4.405               | 242,570        | 304,516                | 279,901              | 3.318               | 928,755        |
| 2                                                                                   | Battam Bang      | 366,357            | 358,633              | 3.250               | 1,165,563      | 17,244                 | 17,244               | 4.130               | 71,218         | 383,601                | 375,877              | 3.290               | 1,236,781      |
| 3                                                                                   | Kampong Cham     | 93,792             | 93,792               | 3.419               | 320,653        | 42,706                 | 42,325               | 4.150               | 175,654        | 136,498                | 136,117              | 3.646               | 496,307        |
| 4                                                                                   | Kampong Chhnang  | 127,655            | 127,655              | 3.499               | 446,660        | 41,712                 | 41,652               | 4.650               | 193,682        | 169,367                | 169,307              | 3.782               | 640,342        |
| 5                                                                                   | Kampong Speu     | 114,996            | 111,829              | 3.035               | 339,435        | 450                    | 450                  | 3.351               | 1,508          | 115,446                | 112,279              | 3.037               | 340,943        |
| 6                                                                                   | Kampong Thom     | 224,890            | 221,727              | 2.658               | 589,329        | 65,455                 | 65,235               | 4.296               | 280,255        | 290,345                | 286,962              | 3.030               | 869,584        |
| 7                                                                                   | KamPot           | 140,199            | 140,199              | 3.216               | 450,901        | 8,515                  | 8,515                | 4.100               | 34,912         | 148,714                | 148,714              | 3.267               | 485,813        |
| 8                                                                                   | Kandal           | 32,619             | 31,851               | 3.263               | 103,922        | 57,600                 | 57,600               | 4.421               | 254,650        | 90,219                 | 89,451               | 4.009               | 358,572        |
| 9                                                                                   | Koh Kong         | 9,835              | 9,835                | 2.701               | 26,560         | –                      | –                    | –                   | –              | 9,835                  | 9,835                | 2.701               | 26,560         |
| 10                                                                                  | Kratie           | 33,571             | 32,134               | 2.770               | 89,010         | 14,143                 | 14,143               | 4.393               | 62,130         | 47,714                 | 46,277               | 3.266               | 151,140        |
| 11                                                                                  | Mondul kiri      | 22,858             | 22,858               | 2.931               | 66,999         | 130                    | 130                  | 4.246               | 552            | 22,988                 | 22,988               | 2.939               | 67,551         |
| 12                                                                                  | Phnom Penh       | 7,884              | 7,884                | 2.699               | 21,282         | 450                    | 450                  | 3.400               | 1,530          | 8,334                  | 8,334                | 2.737               | 22,812         |
| 13                                                                                  | Preah Vihear     | 93,313             | 91,086               | 2.919               | 265,884        | 12                     | 12                   | 3.000               | 36             | 93,325                 | 91,098               | 2.919               | 265,920        |
| 14                                                                                  | Prey Veng        | 270,544            | 270,544              | 3.250               | 879,344        | 111,040                | 111,040              | 4.400               | 488,576        | 381,584                | 381,584              | 3.585               | 1,367,920      |
| 15                                                                                  | Pursat           | 126,813            | 118,598              | 3.609               | 428,027        | 26,912                 | 22,376               | 4.446               | 99,484         | 153,725                | 140,974              | 3.742               | 527,511        |
| 16                                                                                  | Ratana Kiri      | 26,727             | 26,177               | 2.319               | 60,702         | –                      | –                    | –                   | –              | 26,727                 | 26,177               | 2.319               | 60,702         |
| 17                                                                                  | Siemreap         | 186,525            | 182,621              | 2.610               | 476,626        | 22,585                 | 22,585               | 3.530               | 79,725         | 209,110                | 205,206              | 2.711               | 556,351        |
| 18                                                                                  | Preah Sihanouk   | 10,638             | 10,598               | 3.232               | 34,254         | –                      | –                    | –                   | –              | 10,638                 | 10,598               | 3.232               | 34,254         |
| 19                                                                                  | Stung Treng      | 27,424             | 24,807               | 2.499               | 62,005         | –                      | –                    | –                   | –              | 27,424                 | 24,807               | 2.499               | 62,005         |
| 20                                                                                  | Svay Rieng       | 169,820            | 169,577              | 2.831               | 480,091        | 20,102                 | 20,102               | 4.300               | 86,439         | 189,922                | 189,679              | 2.987               | 566,530        |
| 21                                                                                  | Takeo            | 209,373            | 209,373              | 3.398               | 711,473        | 101,511                | 101,511              | 4.898               | 497,201        | 310,884                | 310,884              | 3.888               | 1,208,674      |
| 22                                                                                  | Oddar Meanchey   | 95,784             | 95,784               | 2.737               | 262,121        | 139                    | 139                  | 3.504               | 487            | 95,923                 | 95,923               | 2.738               | 262,608        |
| 23                                                                                  | Kep              | 3,632              | 3,632                | 3.385               | 12,294         | 20                     | 20                   | 3.650               | 73             | 3,652                  | 3,652                | 3.386               | 12,367         |
| 24                                                                                  | Pailin           | 8,100              | 8,100                | 3.197               | 25,899         | 795                    | 795                  | 3.301               | 2,624          | 8,895                  | 8,895                | 3.207               | 28,523         |
| 25                                                                                  | Tboung Khmum     | 78,540             | 77,518               | 3.409               | 264,261        | 10,920                 | 10,737               | 4.000               | 42,948         | 89,460                 | 88,255               | 3.481               | 307,209        |
| Total                                                                               |                  | 2,731,338          | 2,671,646            | 3.095               | 8,269,480      | 597,508                | 592,128              | 4.418               | 2,616,253      | 3,328,846              | 3,263,774            | 3.335               | 10,885,733     |
| Previous Year                                                                       |                  | 2,739,446          | 2,654,314            | 3.094               | 8,212,893      | 596,483                | 593,747              | 4.512               | 2,678,842      | 3,335,929              | 3,248,061            | 3.353               | 10,891,735     |
| Comparision                                                                         |                  | -8,108             | 17,332               | 0.001               | 56,587         | 1,025                  | -1,619               | -0.093              | -62,589        | -7,083                 | 15,713               | -0.018              | -6,002         |

**Figure S1.** Rice grain production of Cambodia by provinces from 2010-2019 (Data retrieved from the Ministry of Agriculture, Forestry and Fisheries, Cambodia)
